# Supplementary material
Source: Springer Nature journal article supplement (https://www.springermedizin.de/resource/supplementary/12885_2014_4862_MOESM7_ESM.pdf/9467564)

A-770041 ( $\mu\text{M}$ )

0

0.01

0.1

0.5

Calcein AM

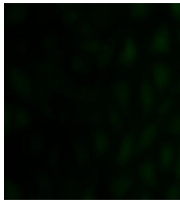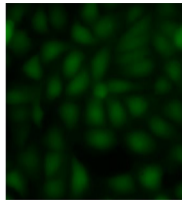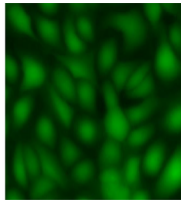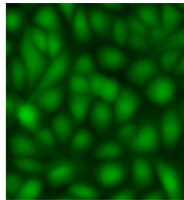

Hoechst

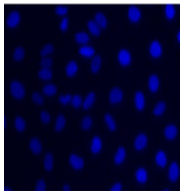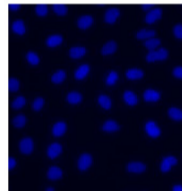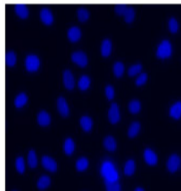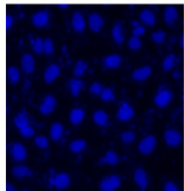

Merge

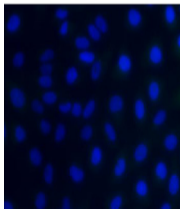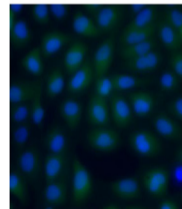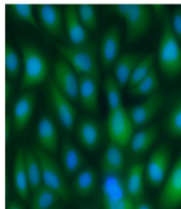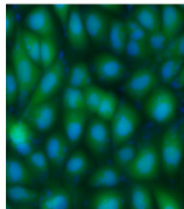

Supplement: MOESM7 [file 9467564]
